# Supplementary material
Source: publisher figshare collection journal article supplement (https://acs.figshare.com/ndownloader/files/15112661)
Supplement: Supplementary file 1 [file 15112661]

compound	SMILES	HeLa	HCT-116	A2780	MDA-MB-231	MCF-7	MRC-5 pd30
OX	O=C1C(O[Pt]2([NH2][C@@H](CCCC3)[C@H]3[NH2]2)O1)=O	36 ñ 2	1.1 ñ 0.2	0.89 ñ 0.06	4.2 ñ 0.3	10 ñ 1	31 ñ 3
OXPA	O=C1C(O[Pt]2([NH2][C@@H](CCCC3)[C@H]3[NH2]2)(OC(CCCC4=CC=CC=C4)=O)(OC(C)=O)O1)=O	23.6 ñ 0.3	1.6 ñ 0.3	13 ñ 1	6.45 ñ 0.02	8 ñ 2	42 ñ 3
OXOA	O=C1C(O[Pt]2([NH2][C@@H](CCCC3)[C@H]3[NH2]2)(OC(CCCCCCC)=O)(OC(C)=O)O1)=O	18 ñ 1	1.1 ñ 0.1	12 ñ 1	4.4 ñ 0.2	3.0 ñ 0.7	42 ñ 5
OXPO	O=C1C(O[Pt]2([NH2][C@@H](CCCC3)[C@H]3[NH2]2)(OC(CCCC4=CC=CC=C4)=O)(OC(CCCCCCC)=O)O1)=O	4.1 ñ 0.2	0.27 ñ 0.02	0.93 ñ 0.05	0.46 ñ 0.03	1.3 ñ 0.4	5.0 ñ 0.3
56MeSS	CC1=C(C)C4=C3C2=C1C=CC=[N]2[Pt]5([NH2][C@@H](CCCC6)[C@H]6[NH2]5)[N]3=CC=C4	0.37 ñ 0.01	0.08 ñ 0.01	0.038 ñ 0.009	0.24 ñ 0.03	0.74 ñ 0.1	0.16 ñ 0.01
56MeSSPA	CC1=C(C)C4=C3C2=C1C=CC=[N]2[Pt]5([NH2][C@@H](CCCC6)[C@H]6[NH2]5)(OC(CCCC7=CC=CC=C7)=O)(OC(C)=O)[N]3=CC=C4	0.32 ñ 0.06	0.07 ñ 0.01	0.23 ñ 0.06	0.08 ñ 0.01	0.78 ñ 0.09	0.467 ñ 0.004
56MeSSOA	CC1=C(C)C4=C3C2=C1C=CC=[N]2[Pt]5([NH2][C@@H](CCCC6)[C@H]6[NH2]5)(OC(CCCCCCC)=O)(OC(C)=O)[N]3=CC=C4	0.29 ñ 0.02	0.07 ñ 0.01	0.20 ñ 0.04	0.07 ñ 0.01	0.64 ñ 0.08	0.357 ñ 0.009
56MeSSPO	CC1=C(C)C4=C3C2=C1C=CC=[N]2[Pt]5([NH2][C@@H](CCCC6)[C@H]6[NH2]5)(OC(CCCC7=CC=CC=C7)=O)(OC(CCCCCCC)=O)[N]3=CC=C4	0.29 ñ 0.02	0.064 ñ 0.006	0.17 ñ 0.01	0.06 ñ 0.01	0.6 ñ 0.1	0.122 ñ 0.008
